# Supplementary material
Source: PubMed Central journal article supplement (PMC11073177)
Supplement: 18_2023_4828_MOESM1_ESM.pdf [file 18_2023_4828_MOESM1_ESM.pdf]

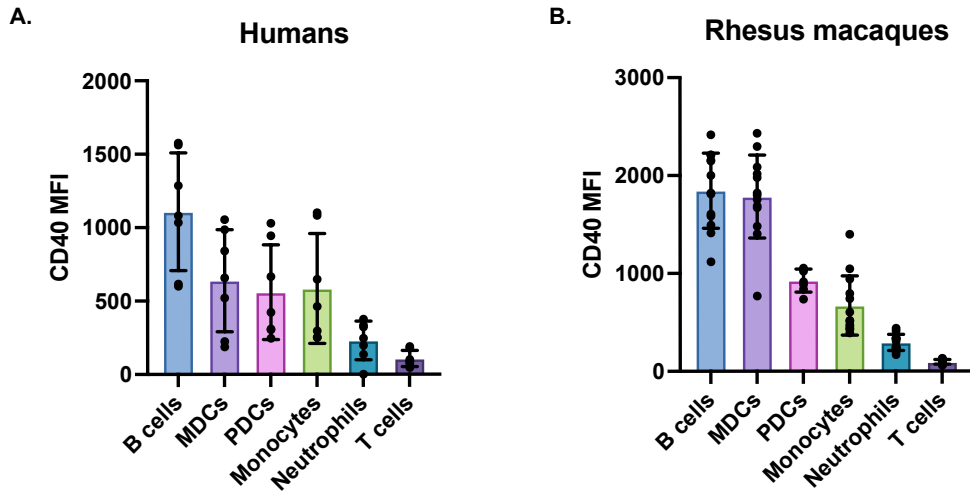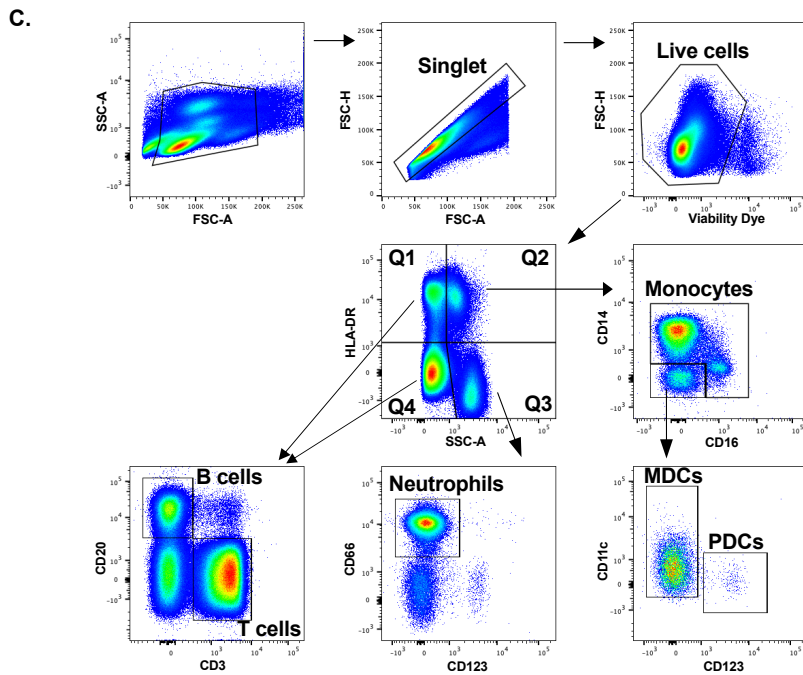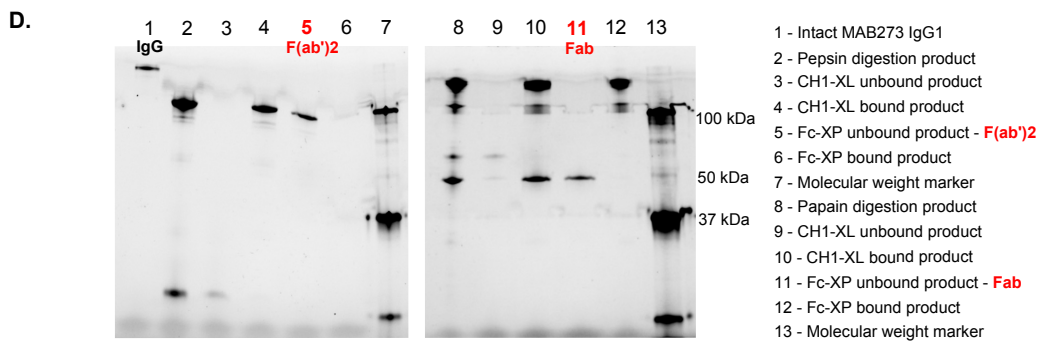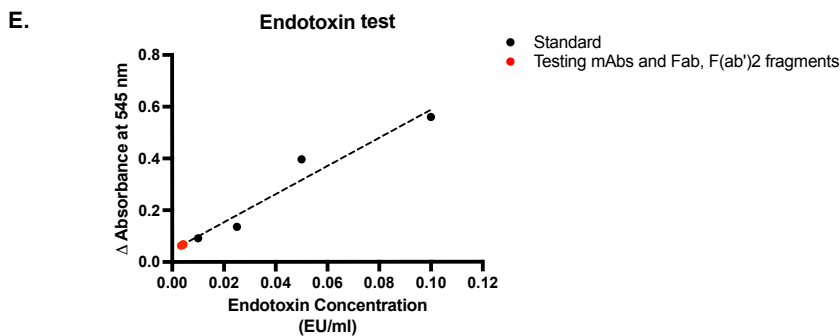

Supplementary Figure 2

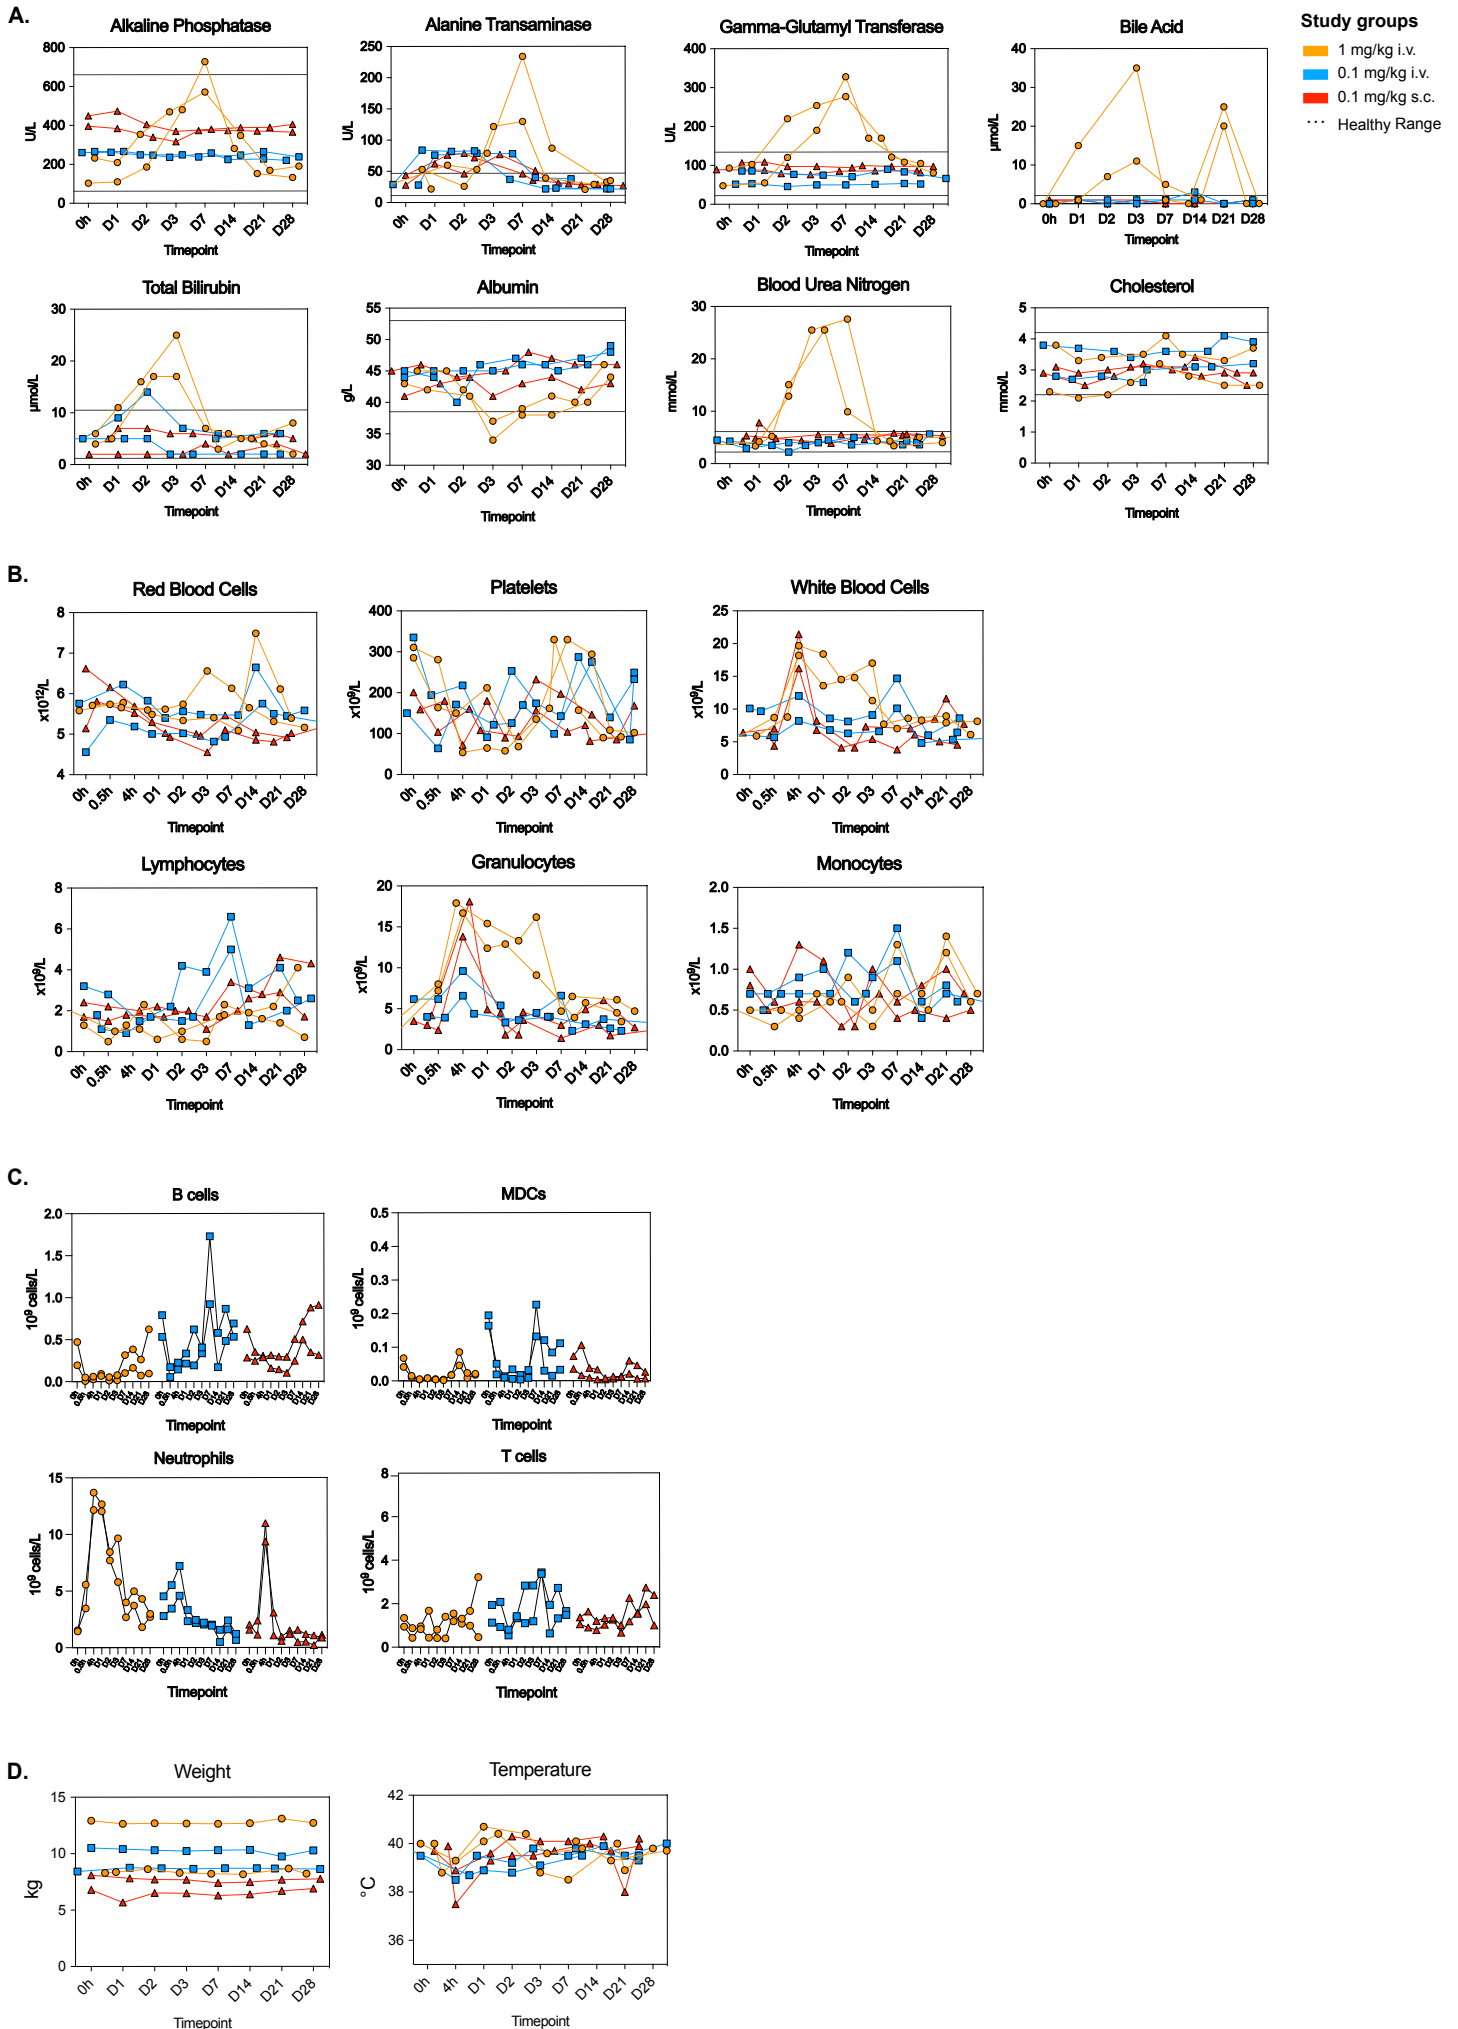

Supplementary Figure 3

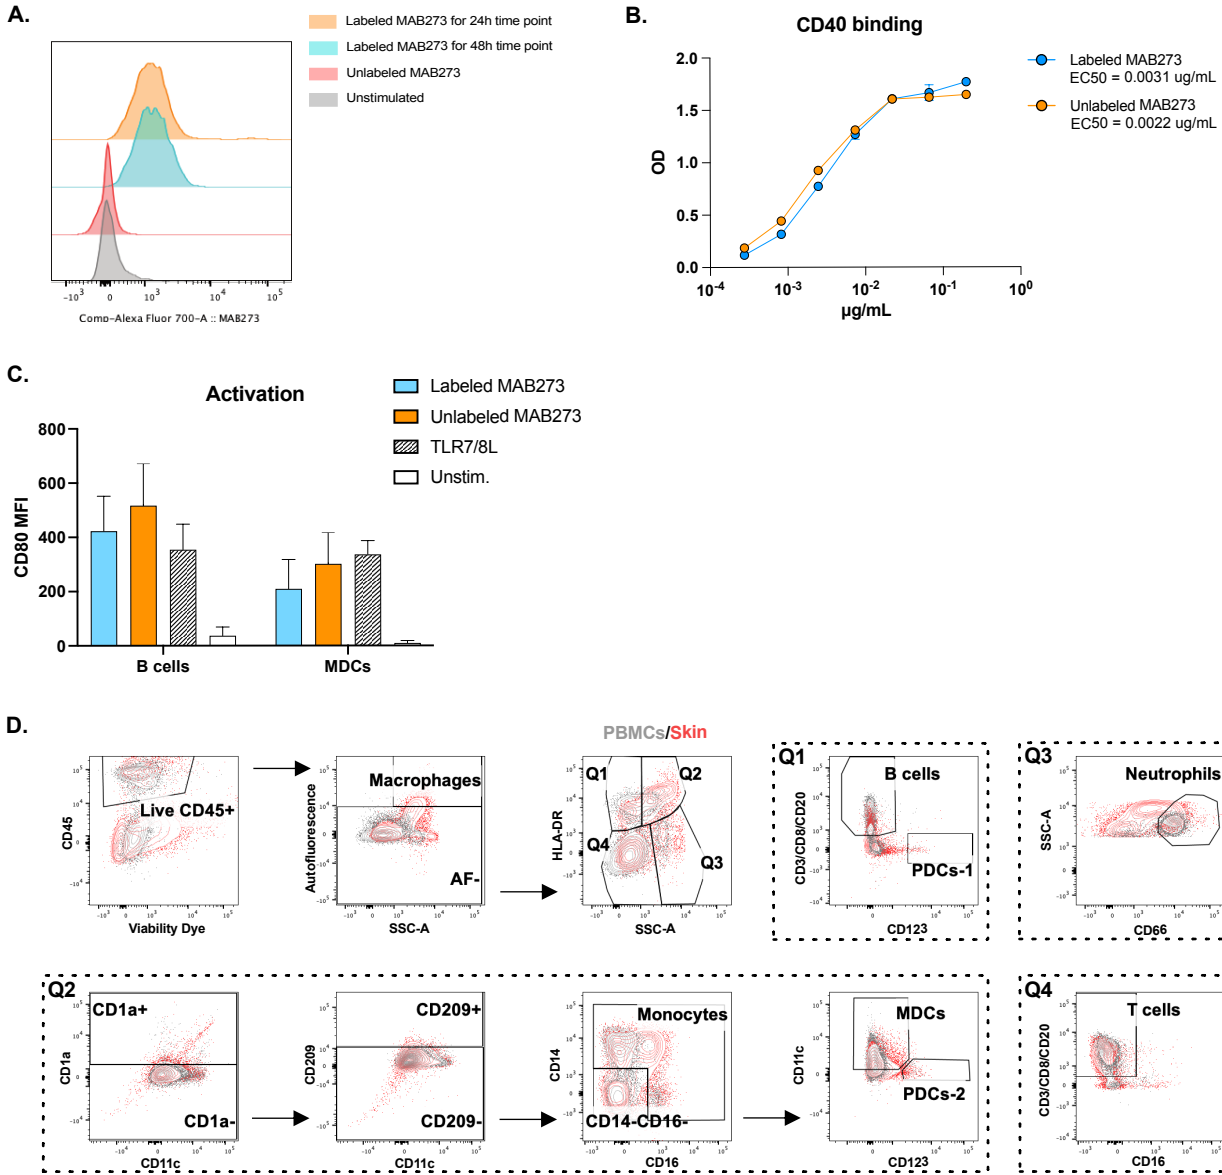

Supplementary Figure 4

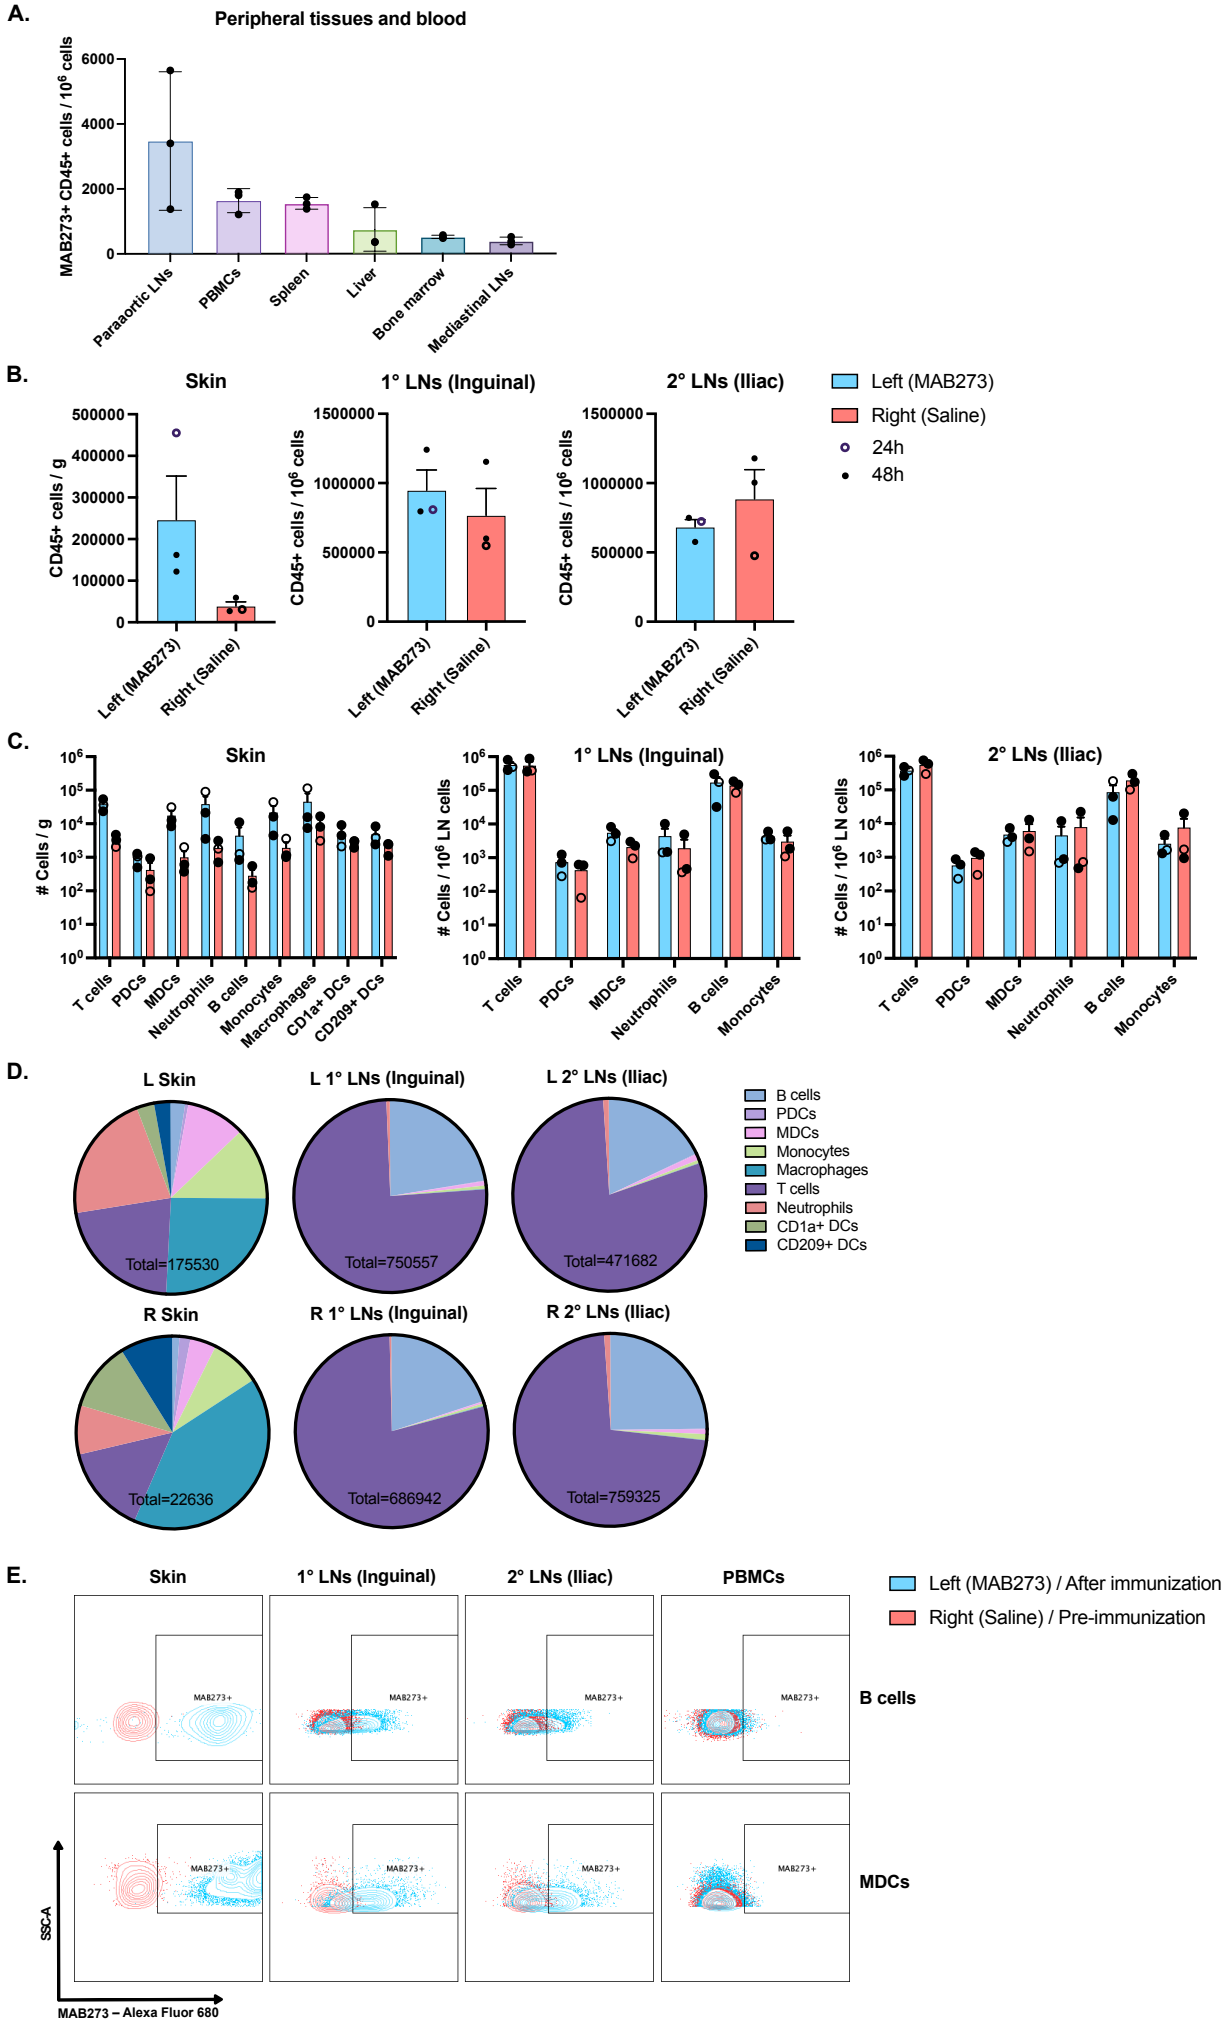

Supplementary Figure 5

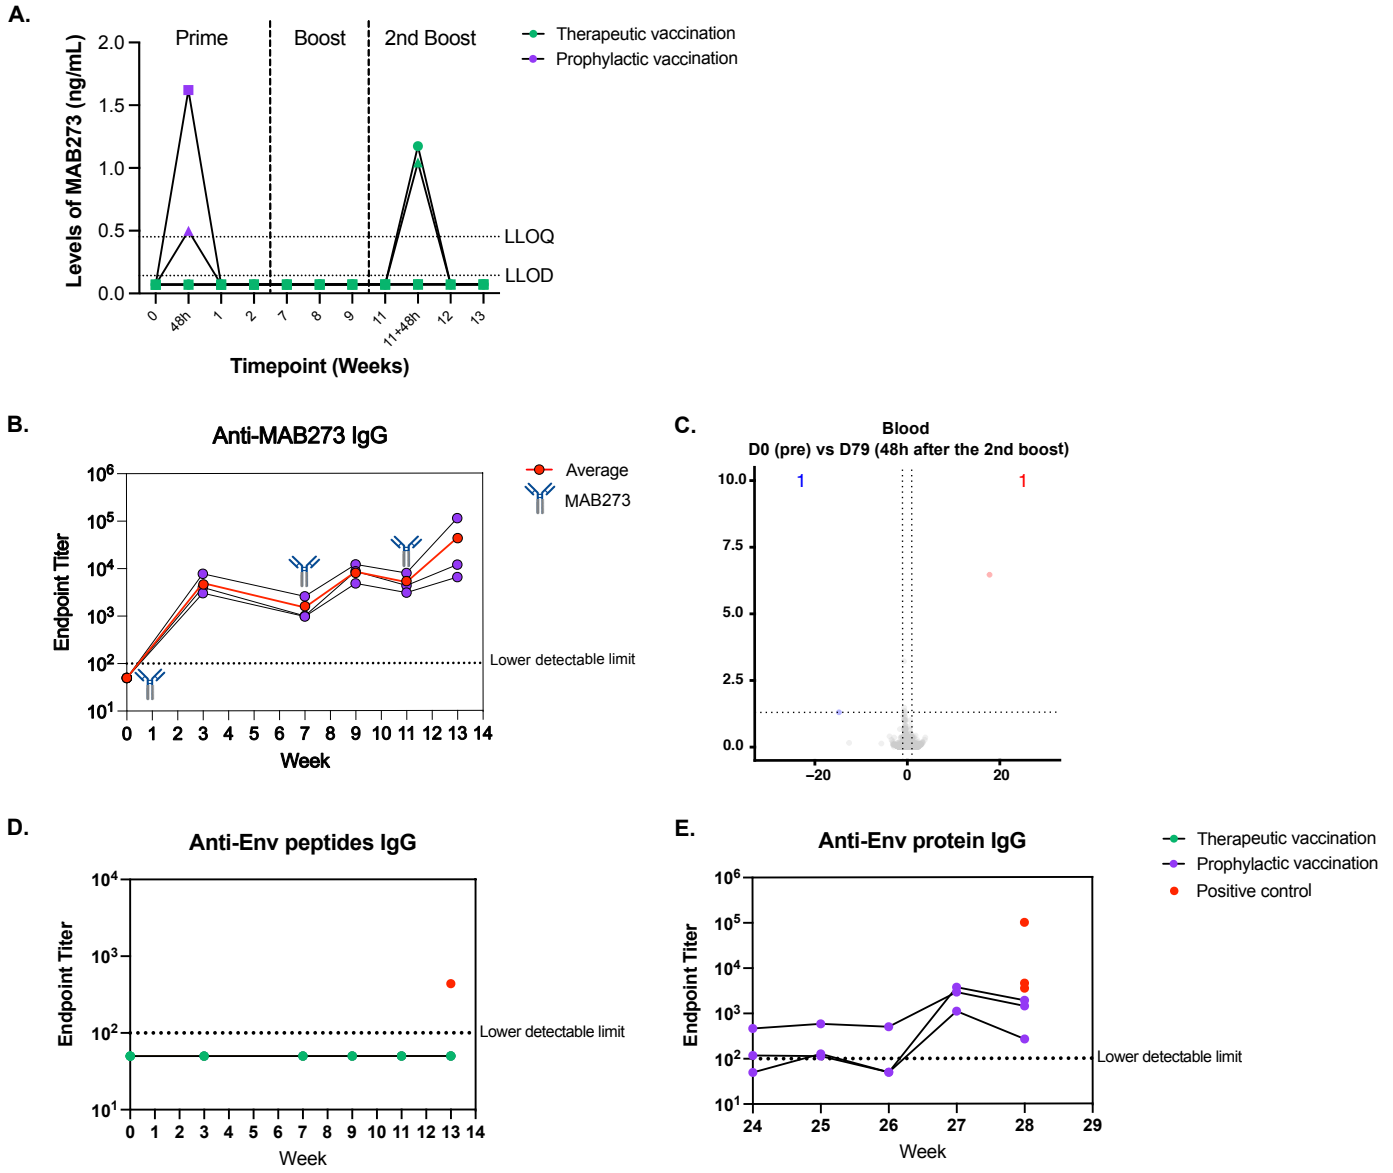

Supplementary Table 1

| Antibody                         | Fluorochrome  | Clone     | Company      | Antibody                               | Fluorochrome | Clone     | Company      |
|----------------------------------|---------------|-----------|--------------|----------------------------------------|--------------|-----------|--------------|
| Phenotype of innate immune cells |               |           |              | Antigen-specific T cells surface       |              |           |              |
| CD40                             | FITC          | 5C3       | Biologend    | OX40                                   | BV510        | L106      | BD           |
| NKq2a                            | PE            | Z199      | Beckman      | CCR7                                   | BV786        | G043H7    | Biologend    |
| CD80                             | BV421         | L307.4    | BD           | CD103                                  | FITC         | 2G5       | Beckman      |
| CCR7                             | PE-Dazzle 594 | G043H7    | Biologend    | CD8a                                   | BV711        | RPA-T8    | Biologend    |
| CD123                            | PerCp-Cy5.5   | 7G3       | BD           | CD4                                    | PE-Cy5.5     | S3.5      | Invitrogen   |
| CD3                              | APC-Cy7       | SP34-2    | BD           | CD45RA                                 | BV650        | 5H9       | BD           |
| CD66                             | APC           | TET2      | Miltenyi     | Antigen-specific T cells intracellular |              |           |              |
| CD70                             | BV786         | Ki-24     | BD           | 4-1BB                                  | APC          | 4B4-1     | BD           |
| HLA-DR                           | BV650         | L243      | Biologend    | IL-2                                   | PE           | MQ1-17H12 | BD           |
| CD11c                            | PE-Cy7        | 3.9       | Biologend    | CD69                                   | ECD          | TP1.55.3  | Beckman      |
| CD16                             | AF700         | 3G8       | BD           | CD3                                    | APC-Cy7      | SP34.2    | BD           |
| CD20                             | BV605         | 2H7       | Biologend    | IFNg                                   | AF700        | B27       | Biologend    |
| CD14                             | BV510         | M5E2      | Biologend    | B cell proliferation                   |              |           |              |
| Labeled antibody tracking        |               |           |              | HLA-DR                                 | PE-Cy5.5     | Tu36      | ThermoFisher |
| CD1a                             | PE            | SK9       | BD           | CD3                                    | APC-Cy7      | SP34-2    | BD           |
| CD209                            | PerCP-Cy5.5   | DCN46     | BD           | CD20                                   | BV605        | 2H7       | Biologend    |
| CD40                             | FITC          | 5C3       | Biologend    | CD40                                   | FITC         | 5C3       | Biologend    |
| CD11c                            | PE-Cy7        | 3.9       | Biologend    | CD40L competition                      |              |           |              |
| CD14                             | BV711         | M5E2      | Biologend    | Streptavidin                           | PE           |           | Biologend    |
| CD66                             | APC           | TET2      | Miltenyi     | CD3                                    | APC-Cy7      | SP34-2    | BD           |
| CD45                             | BV605         | D058-1283 | BD           | HLA-DR                                 | PE-Cy5.5     | Tu36      | ThermoFisher |
| CCR7                             | PE-Dazzle 594 | G043H7    | Biologend    | CD11c                                  | PE-Cy7       | 3.9       | Biologend    |
| CD3                              | APC-Cy7       | SP34-2    | BD           | CD20                                   | BV605        | 2H7       | Biologend    |
| CD8                              | APC-Cy7       | RPA-T8    | BD           | CD14                                   | BV510        | M5E2      | Biologend    |
| CD20                             | APC-Cy7       | L27       | BD           | CD16                                   | BV421        | 3G8       | Biologend    |
| HLA-DR                           | PE-Cy5.5      | Tu36      | ThermoFisher |                                        |              |           |              |
| CD123                            | BV510         | 6H6       | Biologend    |                                        |              |           |              |
| CD80                             | BV650         | L307.4    | BD           |                                        |              |           |              |
| CD16                             | BV421         | 3G8       | Biologend    |                                        |              |           |              |
